# Supplementary material for: In Situ Vitrification of Lung Cancer Organoids on a Microwell Array
Source: MDPI journal article supplement (doi:10.3390/mi12060624), 2021-05-28
Supplement: s1 [file s1]

Table S1. Recipe of the lung cancer organoid culture media (LCOM)

| Reagents                | Source                  | Catalog No. | Final concentration |
|-------------------------|-------------------------|-------------|---------------------|
| DMEM/F12                | ThermoFisher Scientific | 11320-033   |                     |
| GlutaMAX                | Gibco                   | 35050-061   | 1%(v/v)             |
| HEPES                   | Gibco                   | 15630-080   | 10 mM               |
| Penicillin/Streptomycin | Hyclone                 | SV30010     | 1%(v/v)             |
| B-27 Supplement         | Invitrogen              | 17504044    | 2% (v/v)            |
| N2 Supplement           | Invitrogen              | 17502048    | 1% (v/v)            |
| Nicotinamide            | Selleckchem             | 1899        | 5 mM                |
| N-Acetyl-L-cysteine     | Selleckchem             | S1632       | 1 mM                |
| Y-27632                 | Selleckchem             | S1049       | 10 $\mu$ M          |
| EGF                     | Peptotech               | AF-100-15   | 50 ng/mL            |
| SB202190                | Selleckchem             | S1077       | 3 $\mu$ M           |
| A83-01                  | Tocris                  | 2939        | 5 $\mu$ M           |
| Forskolin               | Selleckchem             | 2449        | 10 $\mu$ M          |
| Dexamethasone           | Selleckchem             | 1322        | 3 nM                |

Table S2. Primer sequences for qPCR analysis of selected genes and control.

| Primer name | Sequence (5'-3')          |
|-------------|---------------------------|
| GAPDH-F     | GTCTGAACCATGAGAAGTATGA    |
| GAPDH-R     | CTTCCACGATACCAAAGTTGT     |
| Bax-F       | GTCAGCTGCCACTCGGAAA       |
| Bax-R       | AGTAACATGGAGCTGCAGAGGAT   |
| Bcl-2-F     | TCAGAGACAGCCAGGAGAAATCA   |
| Bcl-2-R     | CCTGTGGATGACTGAGTACCTGAA  |
| Bcl-XL-F    | ATGGCAGCAGTAAAGCAAGC      |
| Bcl-XL-R    | CGGAAGAGTTTCATTCACTACCTGT |
| Bid-F       | ACTGGTGTTTGGCTTCCTCC      |
| Bid-R       | ATTCTTCCCAAGCGGGAGTG      |
| SOD1-F      | CTGAAGGCCTGCATGGATTC      |
| SOD1-R      | CCAAGTCTCCAACATGCCTCTC    |
| p53-F       | CCCAAGCAATGGATGATTTGA     |
| p53-R       | GGCATTCTGGGAGCTTCATCT     |
